# Supplementary material
Source: publisher figshare collection journal article supplement (https://acs.figshare.com/ndownloader/files/12894608)
Supplement: Supplementary file 1 [file 12894608]

## Supporting Information for the manuscript

### Effects of Carbon Support Nanostructures on the Reactivity of Ru Nanoparticle Catalyst in Hydrogen Transfer Reaction

*Takeharu Yoshii,<sup>†</sup> Kazuki Nakatsuka,<sup>†</sup> Tatsuya Mizobuchi,<sup>†</sup> Yasutaka Kuwahara,<sup>†,‡</sup>*

*Hiroyuki Itoi,<sup>//</sup> Kohsuke Mori,<sup>†,‡,§</sup> Takashi Kyotani,<sup>⊥</sup> and Hiromi Yamashita\*,<sup>†,‡</sup>*

<sup>†</sup> Division of Materials and Manufacturing Science, Graduate School of Engineering, Osaka University, 2-1 Yamadaoka, Suita, Osaka 565-0871, Japan.

<sup>‡</sup> Elements Strategy Initiative for Catalysts & Batteries Kyoto University, ESICB, Kyoto University, Katsura, Kyoto 615-8520, Japan.

<sup>§</sup> JST, PRESTO, 4-1-8 Honcho, Kawaguchi, Saitama 332-0012, Japan.

<sup>//</sup> Department of Applied Chemistry, Aichi Institute of Technology, Yachigusa 1247, Yakusa-cho, Toyota, Aichi 470-0392, Japan.

<sup>⊥</sup> Institute of Multidisciplinary Research for Advanced Materials, Tohoku University, 2-1-1 Katahira, Aoba-ku, Sendai, Miyagi 980-8577, Japan.

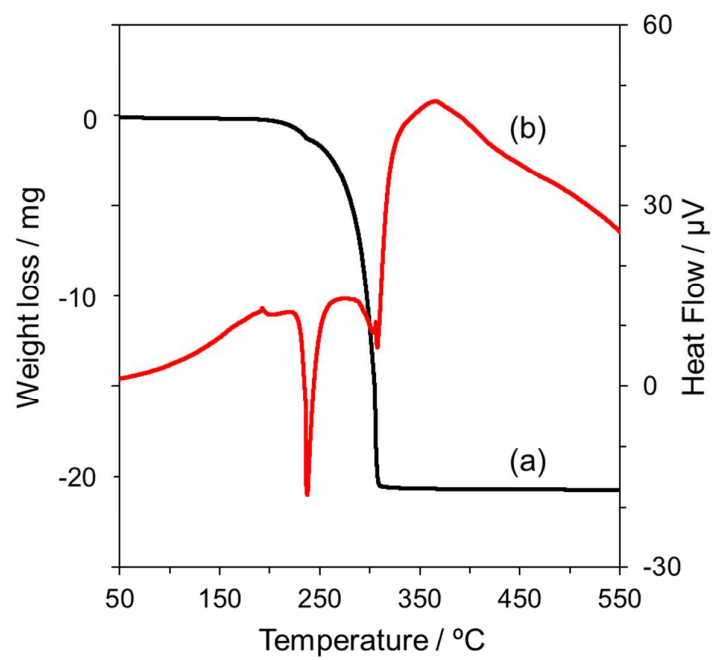

**Fig. S1** (a) TG profile and (b) DTA profile of Ru(acac)<sub>3</sub> measured under air flow.

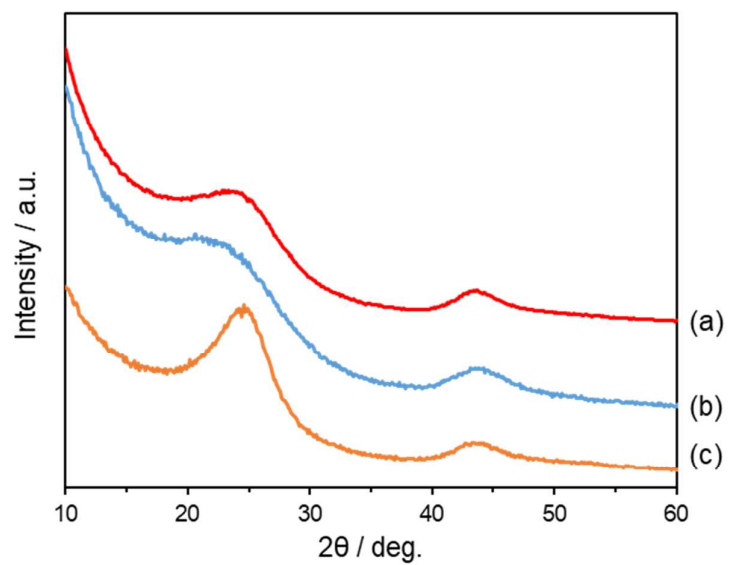

**Fig. S2** XRD patterns of (a) Ru/KB, (b) Ru/AC and (c) Ru/VC.

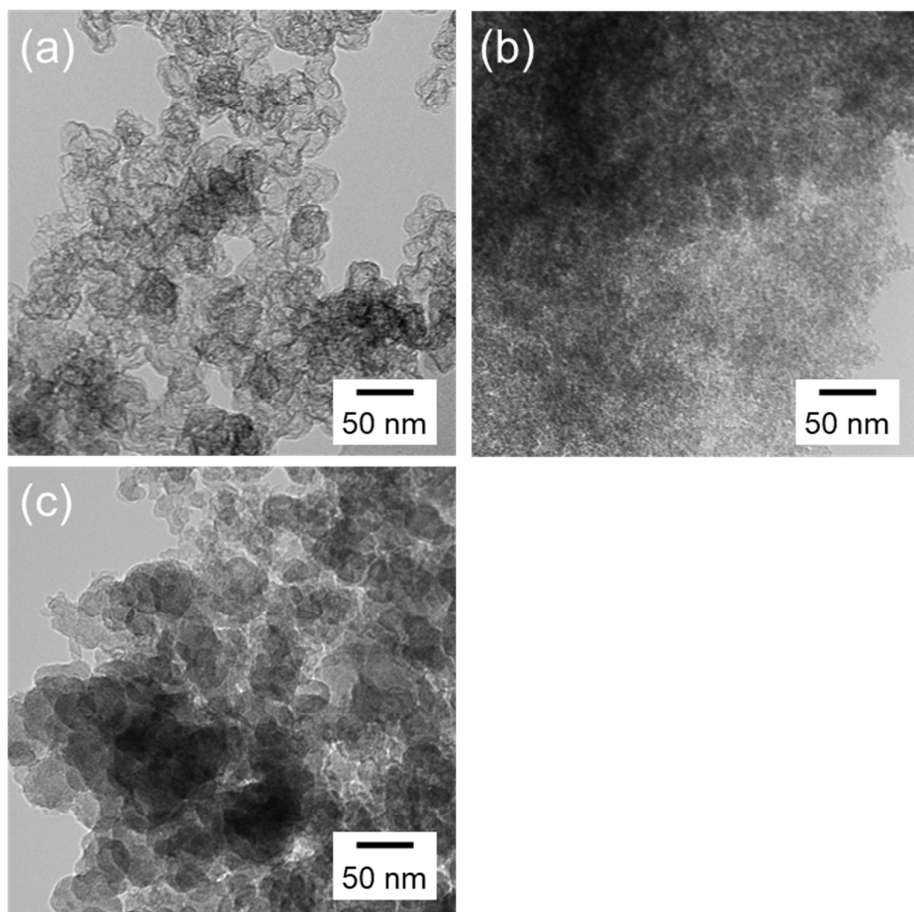

**Fig. S3** TEM images of (a) KB, (b) AC and (c) VC.

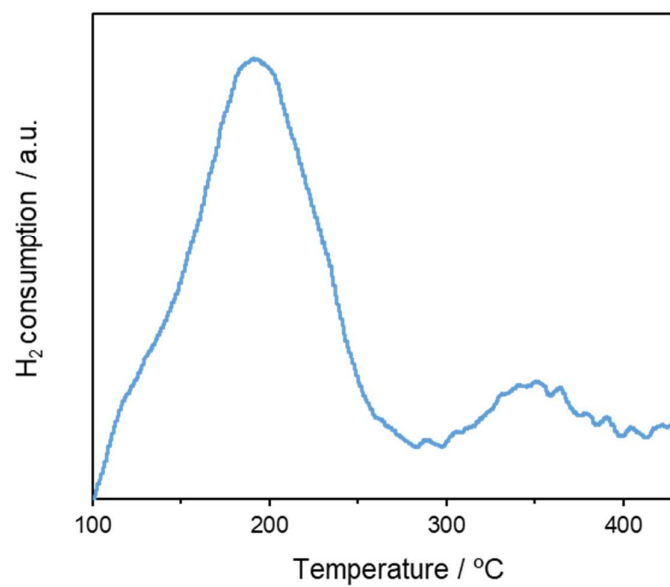

**Fig. S4** H<sub>2</sub>-TPR profiles of Ru/AC-600.
